# Supplementary material for: Comprehensive Study of the Chemistry behind the Stability of Carboxylic SWCNT Dispersions in the Development of a Transparent Electrode
Source: MDPI journal article supplement (doi:10.3390/nano12111901), 2022-06-01
Supplement: s1 [file s1]

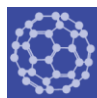

Supplementary Material

# Comprehensive Study of the Chemistry behind the Stability of Carboxylic SWCNT Dispersions in the Development of a Transparent Electrode

Jovana Stanojev <sup>1,\*</sup>, Stevan Armaković <sup>2</sup>, Sara Joksović <sup>1</sup>, Branimir Bajac <sup>1</sup>, Jovan Matović <sup>1</sup> and Vladimir V. Srdić <sup>3</sup>

<sup>1</sup> BioSense Institute, University of Novi Sad, Dr Zorana Djindjica 1, 21000 Novi Sad, Serbia;

sara.joksovic@biosense.rs (S.J.); branimir.bajac@biosense.rs (B.B.); jovan.matovic@biosense.rs (J.M.)

<sup>2</sup> Department of Physics, Faculty of Sciences, University of Novi Sad, Trg Dositeja Obradovica 4, 21000 Novi Sad, Serbia; stevan.armakovic@df.uns.ac.rs

<sup>3</sup> Faculty of Technology Novi Sad, University of Novi Sad, Bulevar Cara Lazara 1, 21000 Novi Sad, Serbia; srdicvv@uns.ac.rs

\* Correspondence: jovana.stanojev@biosense.rs; Tel.: +381-214852137 In the supplementary material is given the Raman spectra of SWCNT-COOH, analyzed with the red laser (780 nm) (Figure S1).

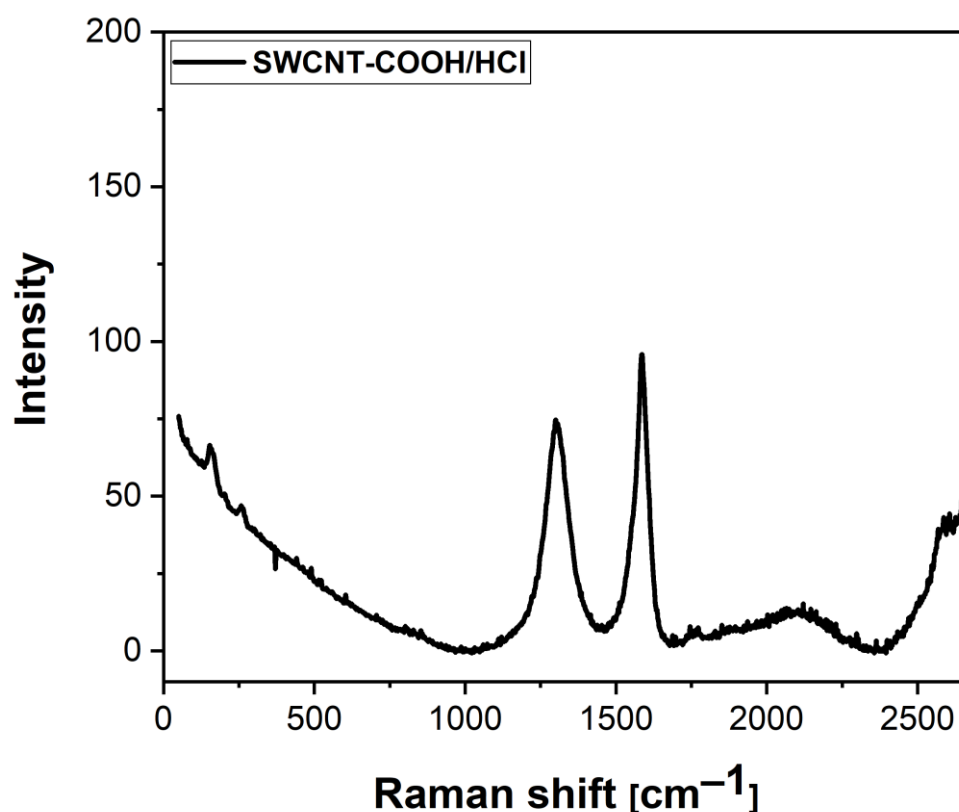

**Figure S1.** Raman spectra of SWCNT-COOH after the HCl treatment, analyzed with the red laser (780 nm).
